# Supplementary material for: Objective and Subjective Clustering Methods for Verb Fluency Responses From Individuals With Alzheimer's Dementia and Cognitively Healthy Older Adults
Source: Am J Speech Lang Pathol. 2023 Sep 18;32(5 Suppl):2589–601. doi: 10.1044/2023_AJSLP-22-00290 (PMC10721246; doi:10.1044/2023_AJSLP-22-00290)
Supplement: Supplemental Material S4 [file AJSLP-32-2589-s004.xlsx]

## Sheet: Control1
	Subjective	Subjective	Objective
Participant Response	Rater 1	Rater 2	Lancaster Norms
Smile	face	face	mouth
Blink	face	face	head
Lick	face	mouth	mouth
Laugh	face	mouth	mouth
Eat	face	mouth	mouth
Cry	face	.	head
Walk	legs	legs	mouth
Run	legs	legs	foot_leg
Jog	legs	legs	foot_leg
Race	legs	legs	foot_leg
Sprint	legs	legs	foot_leg
Trip	legs	legs	foot_leg
Fall	legs	legs	foot_leg
Roll	whole body	.	hand_arm

## Sheet: Control2
	Subjective	Subjective	Objective
Participant Response	Rater 1	Rater 2	Lancaster Norms
Play	whole body	.	hand_arm
Work	whole body	.	head
Ponder	mind	mind	head
Meditate	mind	mind	head
Sing	face	mouth	mouth
Shout	face	mouth	mouth
Speak	face	mouth	mouth
Crap	bodily function	.	torso
Fondle	hands	face	hand_arm
Kiss	face	face	mouth

## Sheet: Control3
	Subjective	Subjective	Objective
Participant Response	Rater 1	Rater 2	Lancaster Norms
See	face	face	head
Smell	face	face	head
Eat	face	face	mouth
Hear	face	face	head
Write	hands	.	hand_arm
Touch	hands	.	hand_arm
Work	whole body	whole	head
Exercise	whole body	whole	hand_arm
Pray	hands	.	head
Walk	legs	legs	foot_leg
Run	legs	legs	foot_leg
Jump	legs	legs	foot_leg
Climb	whole body	legs	foot_leg
Hike	legs	legs	foot_leg

## Sheet: Control4
	Subjective	Subjective	Objective
Participant Response	Rater 1	Rater 2	Lancaster Norms
Eat	face	.	mouth
Drive	arms	.	hand_arm
Paint	arms	hands	hand_arm
Refloor	arms	hands	head
Add	mind	hands	mouth
Sing	face	.	head
Sleep	whole body	.	head
Clear	arms	.	head
Peep	face	.	foot_leg
Turn	legs	.

## Sheet: Control5
	Subjective	Subjective	Objective
Participant Response	Rater 1	Rater 2	Lancaster Norms
Eat	face	mouth	mouth
Breathe	face	mouth	mouth
Sleep	whole body	whole	head
Rest	whole body	whole	head
Walk	legs	legs	foot_leg
Run	legs	legs	foot_leg
Drive	arms	.	hand_arm
Work	whole body	.	head
Hear	face	face	head
Look	face	face	head
Listen	face	face	head
Urinate	bodily function	lower body	torso
Defecate	bodily function	lower body	torso
Travel	whole body	.	foot_leg

## Sheet: Control6
	Subjective	Subjective	Objective
Participant Response	Rater 1	Rater 2	Lancaster Norms
Talk	face	mouth	mouth
Smile	face	mouth	mouth
Cry	face	mouth	head
Laugh	face	mouth	mouth
Run	legs	legs	foot_leg
Jump	legs	legs	foot_leg
Walk	legs	legs	foot_leg
Blink	face	.	head
Swallow	face	mouth	mouth
Sneeze	face	mouth	head
Clap	arms	hand	hand_arm
Count	mind	hand	head
Swim	whole body	.	hand_arm

## Sheet: Control7
	Subjective	Subjective	Objective
Participant Response	Rater 1	Rater 2	Lancaster Norms
Clap	arms	.	hand_arm
Sing	face	.	mouth
Play	whole body	.	hand_arm
Run	legs	legs	foot_leg
Jump	legs	legs	foot_leg
Skip	legs	legs	foot_leg
Bounce	arms	hands	foot_leg
Throw	arms	hands	hand_arm
Dance	whole body	whole	foot_leg
Hop	legs	whole	foot_leg
Skate	legs	.	foot_leg
Talk	face	face	mouth
Smell	face	face	head
Chew	face	face	mouth
Grit	face	face	head

## Sheet: Control8
	Subjective	Subjective	Objective
Participant Response	Rater 1	Rater 2	Lancaster Norms
Wake	mind	.	head
Breathe	face	face	mouth
Smell	face	face	head
Eat	face	face	mouth
Brush	arms	face	hand_arm
Run	legs	.	foot_leg
Work	whole body	.	head
Sleep	whole body	.	head
Laugh	face	mouth	mouth
Talk	face	mouth	mouth
Sing	face	mouth	mouth

## Sheet: Control9
	Subjective	Subjective	Objective
Participant Response	Rater 1	Rater 2	Lancaster Norms
Walk	legs	.	foot_leg
Talk	face	head	mouth
Sleep	whole body	head	head
Cry	face	head	head
Eat	face	head	mouth
Drive	arms	.	hand_arm
Swim	whole body	.	head
Fly	whole body	.	hand_arm

## Sheet: Control12
	Subjective	Subjective	Objective
Participant Response	Rater 1	Rater 2	Lancaster Norms
Snore	face	head	mouth
Sleep	whole body	head	head
Hear	face	head	head
Taste	face	head	mouth
Smell	face	head	head
See	face	head	head
Cook	arms	hands	hand_arm
Mow	whole body	hands	hand_arm
Wash	arms	hands	hand_arm
Shower	arms	.	hand_arm
Iron	arms	.	hand_arm

[truncated: 29 more sheets: Control13, Control14, Control15, Control17, Control20, Control21, Control22, Control23, Control24, Control25, Dementia1, Dementia2, Dementia3, Dementia4, Dementia5, Dementia6, Dementia7, Dementia8, Dementia9, Dementia10 …]
